# Supplementary material for: Optimisation of the electrochemical conversion of CO2 into formate in a flow cell configuration using a bismuth-based electrocatalyst
Source: Royal Society of Chemistry journal article supplement (doi:10.1039/d2gc04482j), 2023-01-01
Supplement: d2gc04482j1.pdf [file d2gc04482j1.pdf]

## Optimisation of the electrochemical conversion of CO<sub>2</sub> into formate in a flow cell configuration using a bismuth-based electrocatalyst

Matteo Miola,<sup>a</sup> Donatella Chillé,<sup>b</sup> Georgia Papanikolaou,<sup>b</sup> Paola Lanzafame,<sup>b</sup> and Paolo P. Pescarmona<sup>a,\*</sup>

- a) Chemical Engineering Group, Engineering and Technology Institute Groningen, University of Groningen, Nijenborgh 4, 9747 AG Groningen, the Netherlands. E-mail: [p.p.pescarmona@rug.nl](mailto:p.p.pescarmona@rug.nl)
- b) Department ChiBioFarAm, University of Messina, ERIC aisbl, INSTM/CASPE, V. le F. Stagno d'Alcontres 31, 98166 Messina, Italy

### Supporting information

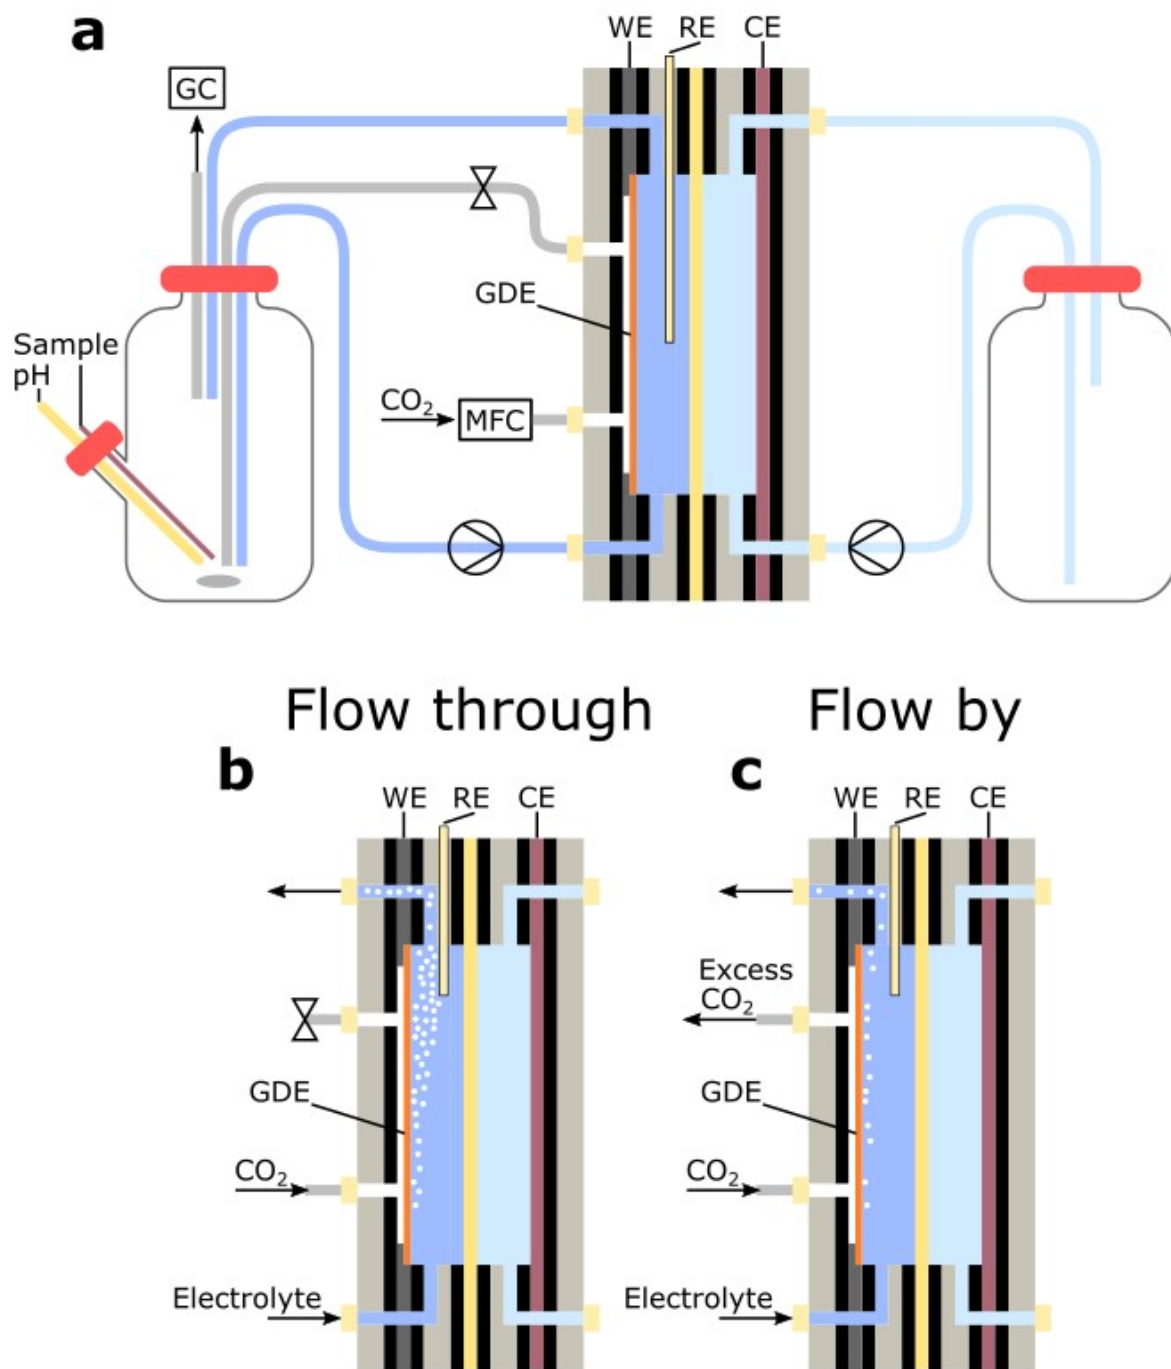

Figure S1: (a) Electrochemical flow cell system representation. CO<sub>2</sub> flow configurations: (b) flow through and (c) flow by.

Table S1: Literature overview on the relevant studies on CO<sub>2</sub> to formate electrochemical conversion in flow cell set up, with focus on multi-hour stability and bismuth-based catalysts.

| Cathode El. area, Cat. load                                         | Catholyte                                                 | Anolyte                                       | Electrolyte Flow (mL min <sup>-1</sup> ) | CO <sub>2</sub> Feed (sccm) | Membrane                                         | FE <sub>formate</sub> (%) | j (A cm <sup>-2</sup> ) | t (h) | E h.c. (V <sub>RHE</sub> ) | E cell (V)   | Ref |
|---------------------------------------------------------------------|-----------------------------------------------------------|-----------------------------------------------|------------------------------------------|-----------------------------|--------------------------------------------------|---------------------------|-------------------------|-------|----------------------------|--------------|-----|
| Bi <sub>0.1</sub> Sn<br>5 cm <sup>2</sup>                           | 1 M KHCO <sub>3</sub> , KOH (pH 11)<br>changed every 48 h |                                               |                                          | 20-50                       | Sustainion X37-50                                | 95                        | 0.1                     | 2400  |                            | 4.3          | 1   |
|                                                                     | hum. CO <sub>2</sub>                                      | 0.1 M KHCO <sub>3</sub><br>(pH 7.2)           | 15                                       | 60                          | Nafion TM 117                                    | 90<br>->80                | 0.06                    | 100   |                            | 3.7<br>->4.5 |     |
| 2D Bi<br>4 cm <sup>2</sup> ,<br>0.4 mg cm <sup>-2</sup>             | hum. CO <sub>2</sub>                                      | 0.5 M H <sub>2</sub> SO <sub>4</sub>          | 100<br>hum. N <sub>2</sub>               | 20                          | PSMIM AEM,<br>SSE-50,<br>Nafion                  | 83                        | 0.03                    | 100   |                            | 2.8          | 2   |
| nBuLi-Bi<br>4.75 cm <sup>2</sup> ,<br>0.7 mg cm <sup>-2</sup>       | hum. CO <sub>2</sub>                                      | hum. H <sub>2</sub>                           | 100<br>hum. N <sub>2</sub>               | 50                          | styrene-DVB<br>sulfonated,<br>PS,<br>Nafion      | 90->70                    | 0.03                    | 100   |                            | 1.4<br>->2.4 | 3   |
| Bi <sub>2</sub> O <sub>2</sub> CO <sub>3</sub> -NS                  | 1 M KOH                                                   |                                               | 10                                       | 50                          | Fumasep<br>FAB-PK-130                            | 93                        | 0.2                     | 24    | -0.69<br>->1.21            |              | 4   |
| Bi-NSs<br>5.25 cm <sup>2</sup> ,<br>1.0 mg cm <sup>-2</sup>         |                                                           | 1 M KOH                                       | 10                                       | 80                          | Selemion                                         | 86                        | 0.198                   | 25    | -0.51                      |              | 5   |
| NTD-Bi<br>16 cm <sup>2</sup> ,<br>1 mg cm <sup>-2</sup>             | 1 M KOH                                                   |                                               | 10                                       | 80                          | Selemion                                         | 95                        | 0.14                    | 13    | -0.85                      |              | 6   |
| Leafy Bi-NS<br>4 cm <sup>2</sup>                                    |                                                           | 1 M KOH                                       | 7.5                                      | 20                          | Fumasep<br>FAA-3-PK-130                          | 90                        | 0.197                   | 10    | -0.52                      |              | 5   |
| BOON Bi-2D<br>6.25 cm <sup>2</sup><br>1 mg cm <sup>-2</sup>         | 0.5 M KHCO <sub>3</sub>                                   | 0.5 M KOH                                     | 10                                       | 50                          | Nafion                                           | 80                        | 0.2                     | 4     |                            | 6.5          | 7   |
|                                                                     |                                                           |                                               | 20                                       | 50                          | BPM                                              | 12                        | 0.2                     | 4     |                            | 6.8          |     |
| Bi-ene<br>1 cm <sup>2</sup> ,<br>0.8 mg cm <sup>-2</sup>            |                                                           | 1 M KOH                                       | 9                                        | 45                          | BPM                                              | 99                        | 0.2                     | 1     | -0.75                      |              | 8   |
| Sn NPs<br>5 cm <sup>2</sup> ,<br>5 mg cm <sup>-2</sup>              | hum. CO <sub>2</sub>                                      | DI                                            | 0.1 DI                                   | 20                          | Sustanion X37,<br>Amberlite IR120,<br>Nafion 324 | 94                        | 0.14                    | 142   |                            | 3.4          | 9   |
| Sn/C<br>25 cm <sup>2</sup> ,<br>2 mg cm <sup>-2</sup>               | hum. CO <sub>2</sub><br>(343 k)                           | 1 M KOH                                       | 10                                       | 300                         | Nafion 115                                       | 91                        | 0.038                   | 48    |                            | 2.2          | 10  |
| SnO <sub>2</sub><br>25 cm <sup>2</sup> ,<br>0.5 mg cm <sup>-2</sup> | 0.4 M K <sub>2</sub> SO <sub>4</sub><br>(60 °C)           | KOH                                           | 40                                       | 80                          | BPM                                              | 100<br>->80               | 0.15                    | 11    |                            | 4            | 11  |
| BDD 0.1%<br>16.4 cm <sup>2</sup>                                    | 0.5 M KCl (1L)<br>CO <sub>2</sub> sat.<br>Start/stop      | 0.5 M K <sub>2</sub> SO <sub>4</sub><br>(1 L) | 3.1                                      |                             | Nafion<br>NRE-212                                | 96                        | 0.15<br>-> 0.2          | 4     | -2.5 V vs Ag               |              | 12  |

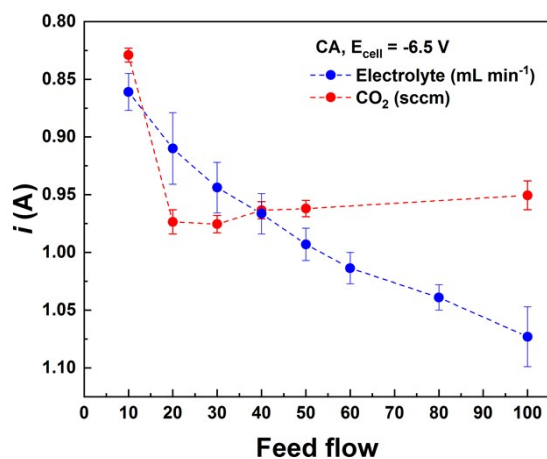

Figure S2: Current ( $i$ ) dependence on electrolyte flow (blue) at constant 50 sccm  $\text{CO}_2$  feed flow and  $\text{CO}_2$  feed flow (red) at constant 50  $\text{mL min}^{-1}$  electrolyte flow, in a BiSub@AC-400 equipped flow cell in CA mode at  $E_{\text{cell}} = -6.5$  V.

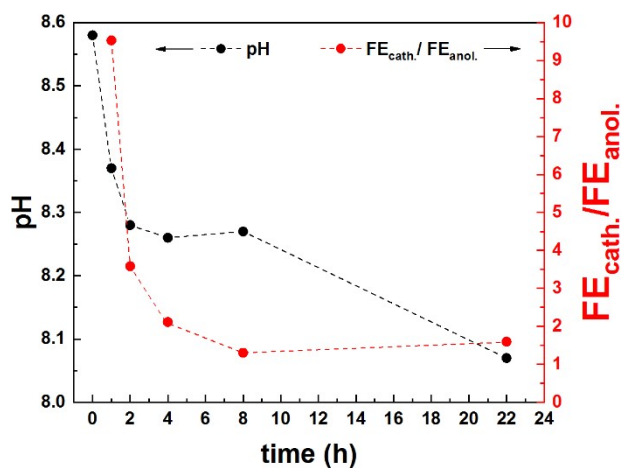

Figure S3: Chronopotentiometry at  $i = 1$  A ( $100 \text{ mA cm}^{-2}$ ) with AEM (Fumatech) and 0.5 M  $\text{KHCO}_3$  both as catholyte and anolyte. Catholyte pH (black dots) and Faradaic efficiency towards formate from catholyte over anolyte ratio (red dots).

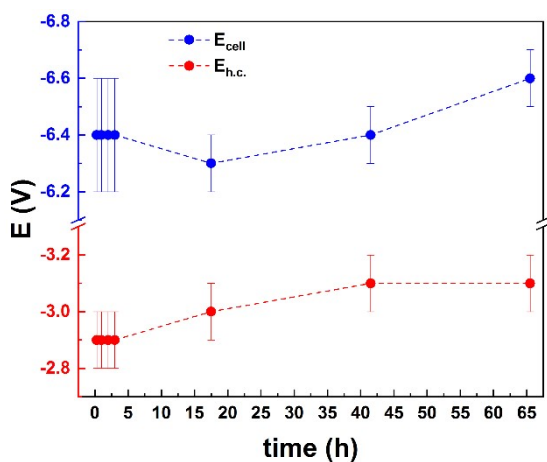

Figure S4: chronopotentiometry at  $i = 1$  A ( $100 \text{ mA cm}^{-2}$ ), 0.5 M  $\text{KHCO}_3$  as catholyte and 0.5 M  $\text{H}_2\text{SO}_4$  as anolyte.  $E_{\text{cell}}$  (blue dots) and  $E_{\text{h.c.}}$  (red dots).

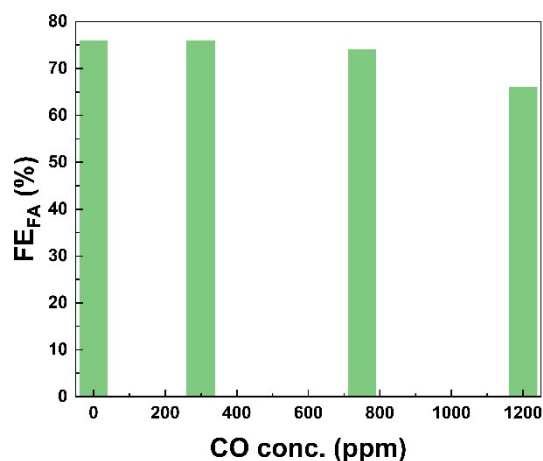

Figure S5:  $FE_{formate}$  vs CO conc. in  $10 \text{ mL min}^{-1} \text{ CO}_2$  stream at  $E = -1.6 \text{ V vs. Ag/AgCl}$  (chronoamperometric mode,  $j = 10 \text{ mA cm}^{-2}$ ) for 5 h.

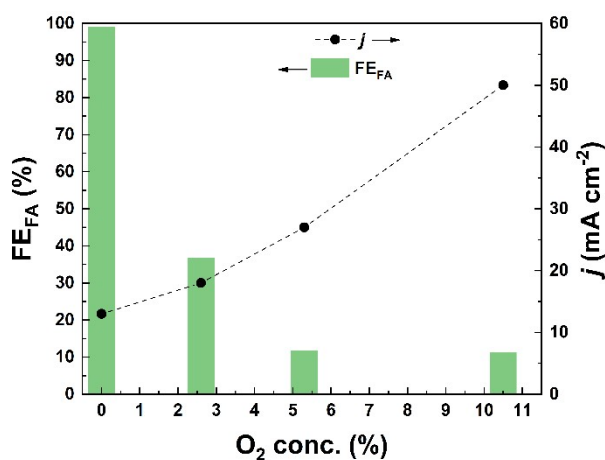

Figure S6:  $FE_{formate}$  vs O<sub>2</sub> conc. in a  $10 \text{ mL min}^{-1} \text{ CO}_2$  stream at  $E = -1.6 \text{ V vs. Ag/AgCl}$  for a total charge of 2 kC (chronoamperometric mode).

Table S2: Indicative flue gas composition at TITAN cement plant.

| Flue gas composition                                   | Max. conc. (%vol.)               |
|--------------------------------------------------------|----------------------------------|
| CO <sub>2</sub>                                        | 16                               |
| O <sub>2</sub>                                         | 14                               |
| H <sub>2</sub> O                                       | 12                               |
| N <sub>2</sub>                                         | Balance                          |
| Trace compounds                                        | Max. conc. (mg m <sup>-3</sup> ) |
| CO                                                     | 1250                             |
| NO <sub>x</sub>                                        | 250                              |
| SO <sub>2</sub>                                        | 25                               |
| NH <sub>3</sub>                                        | 15                               |
| N <sub>2</sub> O                                       | 10                               |
| Dust                                                   | 5                                |
| HCl                                                    | 2                                |
| HF                                                     | 0.20                             |
| Metals (Hg, Cd, Tl, As, Co, Cr, Cu, Mn, Ni, Pb, Sb, V) | 0.11                             |
| PAHs                                                   | 0.06                             |

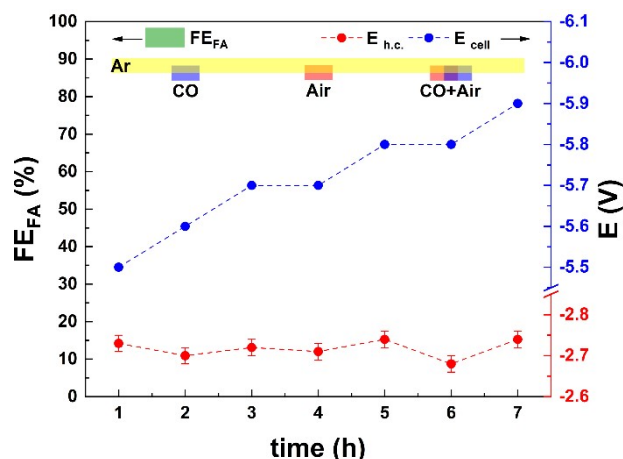

Figure S7: Gas contamination test (Ar in yellow, CO in blue, Air in orange) with chronopotentiometry at  $i = 1 \text{ A}$  ( $100 \text{ mA cm}^{-2}$ ) for 7 h,  $0.5 \text{ M KHCO}_3$  as catholyte and  $0.5 \text{ M H}_2\text{SO}_4$  as anolyte.  $FE_{\text{formate}}$  (green bars),  $E_{\text{cell}}$  (blue dots) and  $E_{\text{h.c.}}$  (red dots).

Table S3: ICP analysis of the Bi content of the electrolyte after 10 h at 1 A for the BiSub@AC-400 loaded GDEs untreated, treated with  $0.5 \text{ M HCOOH}$  or  $\text{HCOOK}$ , and the  $0.5 \text{ M HCOOH}$  and  $\text{HCOOK}$  treating solution after use. The maximum Bi concentration can be  $70.6 \text{ ppm}$  in the treatment solution and  $18.1 \text{ ppm}$  in the electrolyte.

| Sample                                                                        | Average Bi concentration (ppm) |
|-------------------------------------------------------------------------------|--------------------------------|
| 10 h 1 A BiSub@AC-400/GDE ( $0.5 \text{ M NaHCO}_3$ )                         | < 10                           |
| $\text{HCOOH}$ treatment solution ( $0.5 \text{ M HCOOH}$ )                   | $68.4 \pm 0.1$                 |
| 10 h 1 A $\text{HCOOH}$ -treated BiSub@AC-400/GDE ( $0.5 \text{ M NaHCO}_3$ ) | < 10                           |
| $\text{HCOOK}$ treatment solution ( $0.5 \text{ M HCOOK}$ )                   | < 10                           |
| 10 h 1 A $\text{HCOOK}$ -treated BiSub@AC-400/GDE ( $0.5 \text{ M NaHCO}_3$ ) | < 10                           |

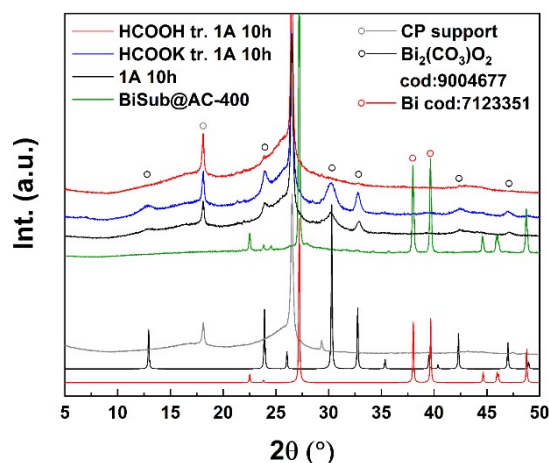

Figure S8: XRD characterisation of BiSub@AC-400 loaded GDE (green), after chronopotentiometry at 1 A for 10 h (black), with  $0.5 \text{ M HCOOK}$  pre-treatment (blue) or with  $0.5 \text{ M HCOOH}$  pre-treatment (red) and references materials: carbon paper (CP) support,  $\text{Bi}_2(\text{CO}_3)\text{O}_2$  and  $\text{Bi}^0$ .

## Turnover frequency (TOF)

The quantification of the *TOF* for heterogeneous electrocatalysts requires estimating the number of catalytically active sites. It has been proposed that the *TOF* can be calculated as: <sup>13</sup>

$$TON = \frac{n_{cycles}}{n_{catalytic\ sites}}, \quad TOF = \frac{TON}{time}, \quad TOF = \frac{j}{F \times n \times S}$$

where *j* is the current density [ $A\ m^{-2}$ ], *F* the Faraday constant ( $96485\ C\ mol^{-1}$ ), *n* the number of electrons transferred to generate one molecule of the product ( $n = 2$ ), *S* the surface concentration of active sites [ $m^{-2}$ ].

The amount of electrocatalytic sites in the electrode (BiSub@AC-400 on carbon paper) was estimated by cyclic voltammetry ( $CO_2$ -saturated  $0.5\ M\ KHCO_3$ , scan rate:  $10\ mV\ s^{-1}$ , flow cell, Area:  $10\ cm^2$ , see Fig. S9). With the integration of the oxidation and reduction peaks and considering the scan rate of  $10\ mV\ s^{-1}$ , we obtained  $Q_{ox} = 0.616\ C$  and  $Q_{red} = 0.430\ C$ , respectively. The redox couple analysed in Fig. S9 is assigned to the Bi(III)-Bi(0) couple (number of exchanged electrons = 3). <sup>14</sup> The number of active sites available for the catalysis (*S*) is therefore estimated as:

$$S = \frac{Q_{red}}{F \times 3 \times 10\ cm^2} = 1.486 \times 10^{-7}\ mol\ cm^{-2}$$

Considering that the electrocatalyst loading is  $0.5\ mg\ cm^{-2}$ , that the electrode exposed geometric area is  $10\ cm^2$ , and that the bismuth catalyst loading is  $47\ wt\%$ , <sup>15</sup> the total amount of bismuth on the electrode is estimated to be  $2.35\ mg$ , which corresponds to  $1.12 \times 10^{-6}\ mol_{Bi}\ cm^{-2}$ . Hence, we can estimate that ca.  $13\ \%$  [ $(1.486 \times 10^{-7}\ mol_{Bi}\ cm^{-2} / 1.12 \times 10^{-6}\ mol_{Bi}\ cm^{-2}) \times 100\%$ ] of the Bi atoms act as electrocatalytic sites.

The *TOF* can then be calculated as follows:

$$TOF = \frac{j}{F \times n \times S} = \frac{0.1\ A\ cm^{-2}}{96485\ A\ s\ mol^{-1} \times 2 \times 1.486 \times 10^{-7}\ mol\ cm^{-2}} = \frac{0.1}{96485 \times 2 \times 1.486 \times 10^{-7}}\ s^{-1} = 3.49\ s^{-1}$$

From which we can obtain the *TOF* towards formate by multiplying the *TOF* value by the  $FE_{formate}$ :

$$TOF_{formate} = 3.49\ s^{-1} \times FE_{formate}$$

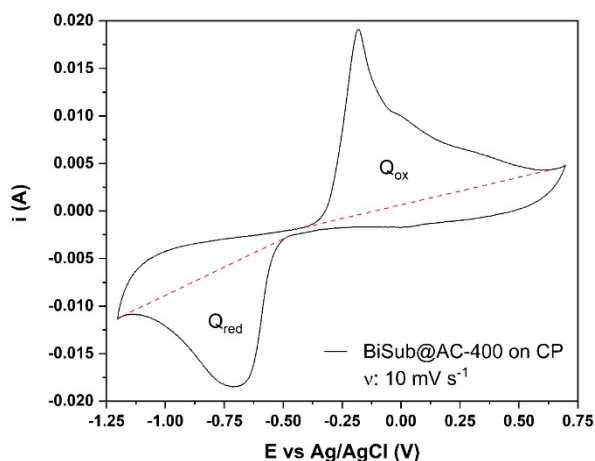

Figure S9: Cyclic voltammetry of the Bi(III)-Bi(0) redox couple obtained with the BiSub@AC-400/CP electrode at  $10 \text{ mV s}^{-1}$  in a flow cell set up ( $\text{CO}_2$ -sat  $0.5 \text{ KHCO}_3$ ,  $50 \text{ mL min}^{-1}$ ).

## References

1. L. Li, A. Ozden, S. Guo, A. d. A. F. P. Garci, C. Wang, M. Zhang, J. Zhang, H. Jiang, W. Wang, H. Dong, D. Sinton, E. H. Sargent and M. Zhong, *Nat. Commun.*, 2021, **12**, 5223.
2. C. Xia, P. Zhu, Q. Jiang, Y. Pan, W. Liang, E. Stavitski, H. N. Alshareef and H. Wang, *Nat. Energy*, 2019, **4**, 776-785.
3. L. Fan, C. Xia, P. Zhu, Y. Lu and H. Wang, *Nat. Commun.*, 2020, **11**, 3633.
4. T. Fan, W. Ma, M. Xie, H. Liu, J. Zhang, S. Yang, P. Huang, Y. Dong, Z. Chen and X. Yi, *Cell Rep.*, 2021, **2**, 100353.
5. J. Yang, X. Wang, Y. Qu, X. Wang, H. Huo, Q. Fan, J. Wang, L. M. Yang and Y. Wu, *Adv. Energy Mater.*, 2020, **10**, 2001709.
6. Q. Gong, P. Ding, M. Xu, X. Zhu, M. Wang, J. Deng, Q. Ma, N. Han, Y. Zhu, J. Lu, Z. Feng, Y. Li, W. Zhou and Y. Li, *Nat. Commun.*, 2019, **10**, 2807.
7. J. Kirner, Y. Chen, H. Liu, J. Song, J. Liao, W. Li and F. Zhao, *J. Electrochem. Soc.*, 2022, **169**.
8. C. Cao, D. D. Ma, J. F. Gu, X. Xie, G. Zeng, X. Li, S. G. Han, Q. L. Zhu, X. T. Wu and Q. Xu, *Angew. Chem. Int. Ed. Engl.*, 2020, **59**, 15014-15020.
9. H. Yang, J. J. Kaczur, S. D. Sajjad and R. I. Masel, *J. CO2 Util.*, 2017, **20**, 208-217.
10. W. Lee, Y. E. Kim, M. H. Youn, S. K. Jeong and K. T. Park, *Angew. Chem. Int. Ed. Engl.*, 2018, **57**, 6883-6887.
11. Y. Chen, A. Vise, W. E. Klein, F. C. Cetinbas, D. J. Myers, W. A. Smith, T. G. Deutsch and K. C. Neyerlin, *ACS Energy Lett.*, 2020, **5**, 1825-1833.
12. Irkham, S. Nagashima, M. Tomisaki and Y. Einaga, *ACS Sustain. Chem. Eng.*, 2021, **9**, 5298-5303.
13. S. Anantharaj, P. E. Karthik and S. Noda, *Angew. Chem. Int. Ed. Engl.*, 2021, **60**, 23051-23067.
14. P. Lamagni, M. Miola, J. Catalano, M. S. Hvid, M. A. H. Mamakhel, M. Christensen, M. R. Madsen, H. S. Jeppesen, X. M. Hu, K. Daasbjerg, T. Skrydstруп and N. Lock, *Adv. Funct. Mater.*, 2020, **30**.
15. M. Miola, B. C. A. de Jong and P. P. Pescarmona, *Chem. Commun.*, 2020, **56**, 14992-14995.
